# Supplementary material for: Lithium storage properties of in situ synthesized Li2FeSiO4 and LiFeBO3 nanocomposites as advanced cathode materials for lithium ion batteries
Source: Royal Society of Chemistry journal article supplement (doi:10.1039/c5ta04588f), 2015-01-01
Supplement: c5ta04588f1.pdf [file c5ta04588f1.pdf]

## Supplementary Information

### Lithium Storage Properties of In-situ $\text{Li}_2\text{FeSiO}_4$ and $\text{LiFeBO}_3$ Nanocomposites as Advanced Cathode Materials for Lithium Ion Batteries

Lin Hu, Jinlong Yang, Ibrahim Saana Amiinu, Xiaochun Kang, Wei Zhang and

Shichun Mu\*

State Key Laboratory of Advanced Technology for Materials Synthesis and

Progressing, Wuhan University of Technology, Wuhan, 430070

E-mail: msc@whut.edu.cn

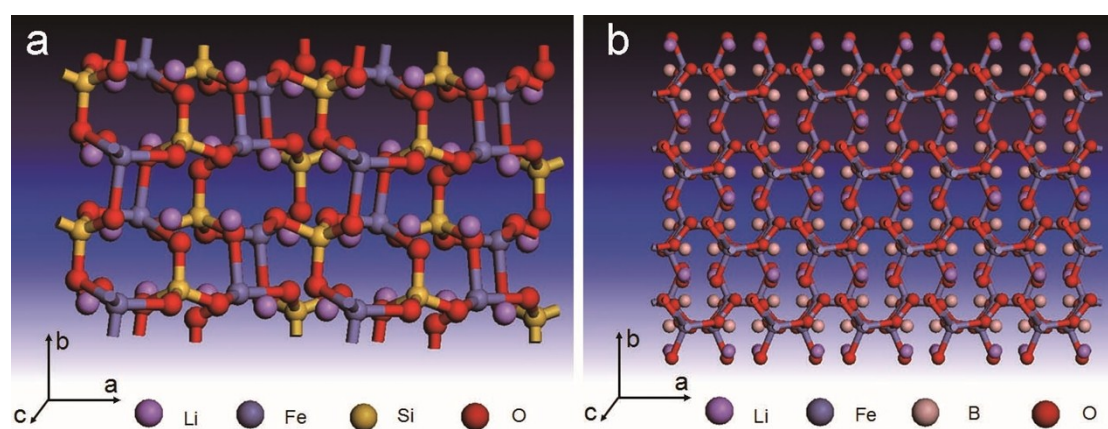

**Figure S1.** The crystal structure of  $\text{Li}_2\text{FeSiO}_4$  (a) and  $\text{LiFeBO}_3$  (b) viewed along the c-axis.

## TG analyses

In the oxygen atmosphere, the reaction of the pure LFS is as following (1):  
suffering from a weight increase from 100 wt. % to 105 wt. %.

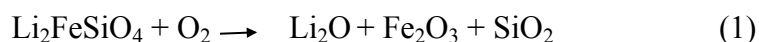

For LFS/C and 0.92LFS·0.08LFB/C composites, the final residues have the analogous composition with the pure LFS sample after 900°C, as following (2):

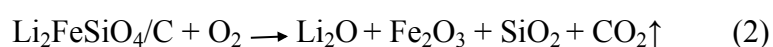

Because of the solid product of LFS/C after reaction with LFS the same, the weight content of the LFS content in the LFS/C is the final percentage weight/105 wt. %, so the carbon content (100 % - (the final percentage weight/105 wt. %)) in the LFS/C and 0.92LFS·0.08LFB/C composites is 11.66 % and 11.59 %, respectively. In our experiments, TGA was conducted in air (oxygen) over a temperature range of 25–900 °C. In **Figure S2**, the increased weight at ~80 °C in both samples is probably due to slight oxidation of Fe<sup>2+</sup>. The increased weight around 300 °C could be caused by a large number of LFS oxidation which has not been identified, the reaction as following (3):

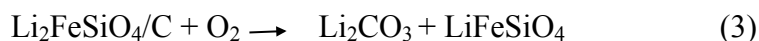

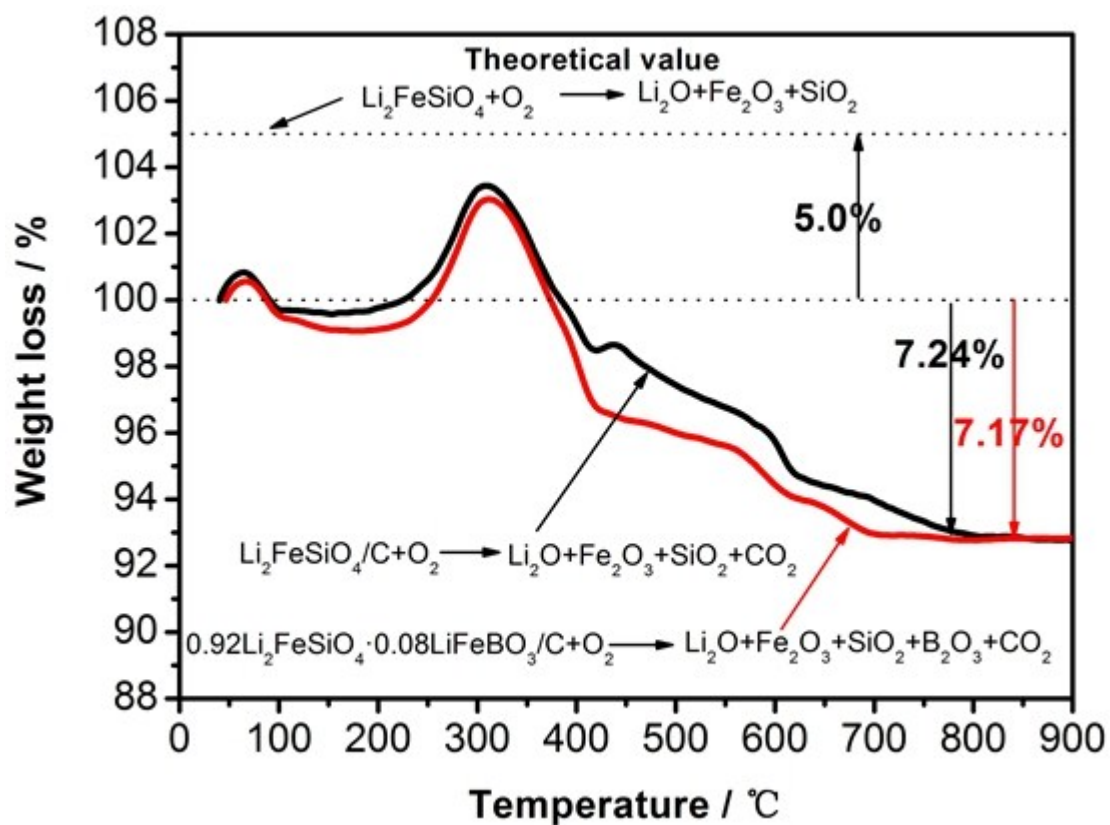

**Figure S2.** Thermogravimetric analysis (TG) curves of (1-x)LFS·xLFB/C composites with x=0 and 0.08.

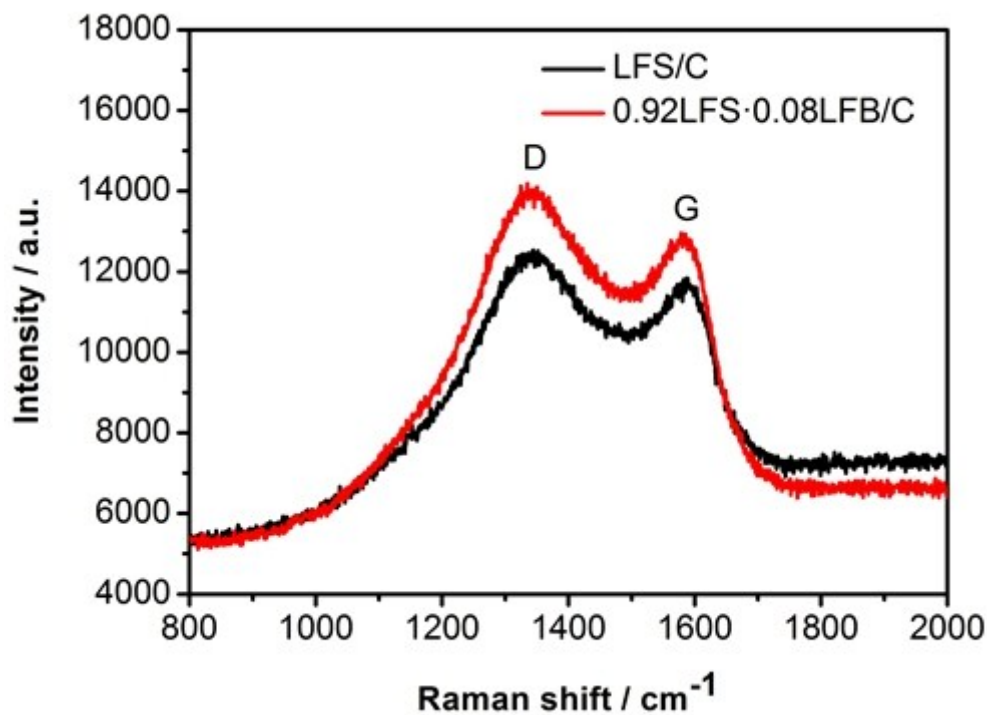

**Figure S3.** Raman spectra of LFS/C and 0.92LFS·0.08LFB/C.

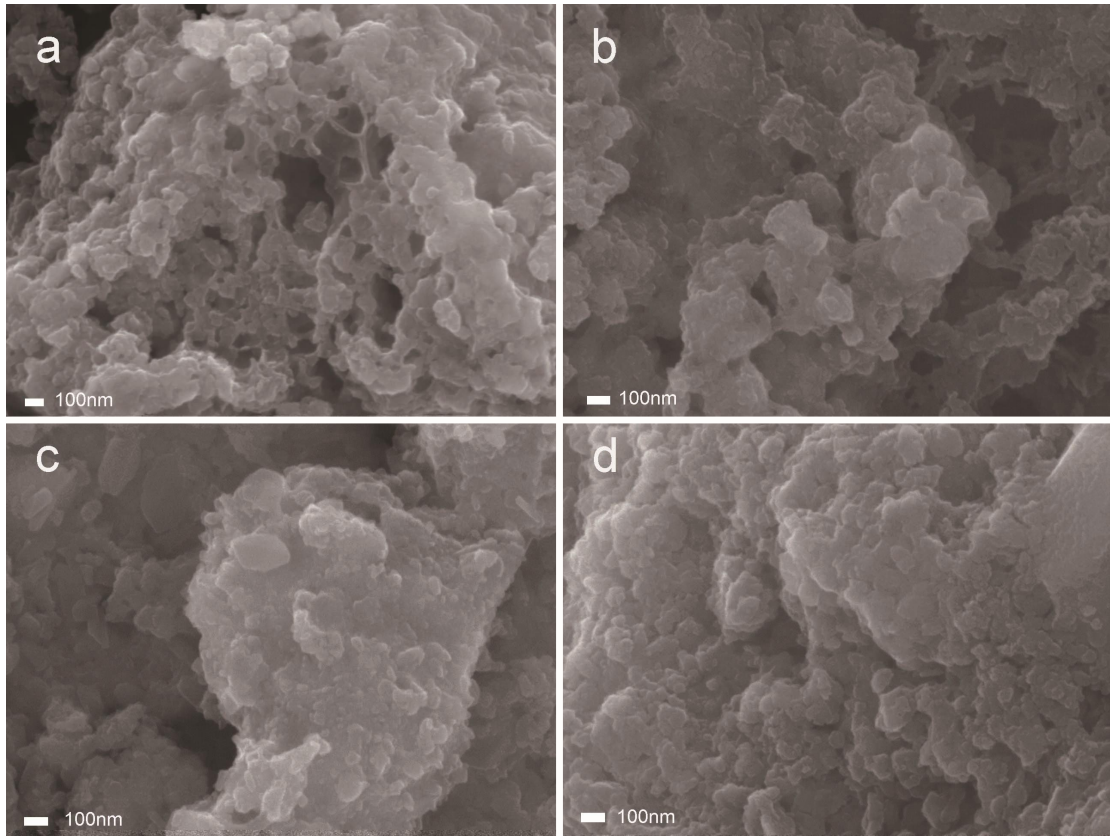

**Figure S4.** SEM images of  $(1-x)\text{LFS}\cdot x\text{LFB}/\text{C}$  composites with  $x=0.02$  (a), 0.05 (b), 0.12 (c) and 1 (d).

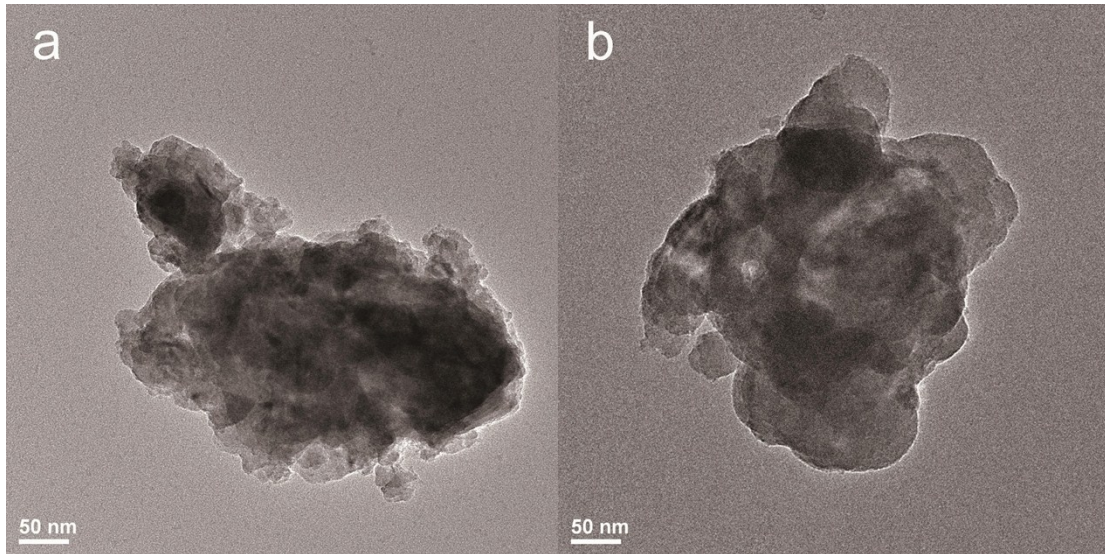

**Figure S5.** TEM images of the LFS/C (a) and  $0.92\text{LFS}\cdot 0.08\text{LFB}/\text{C}$  (b).



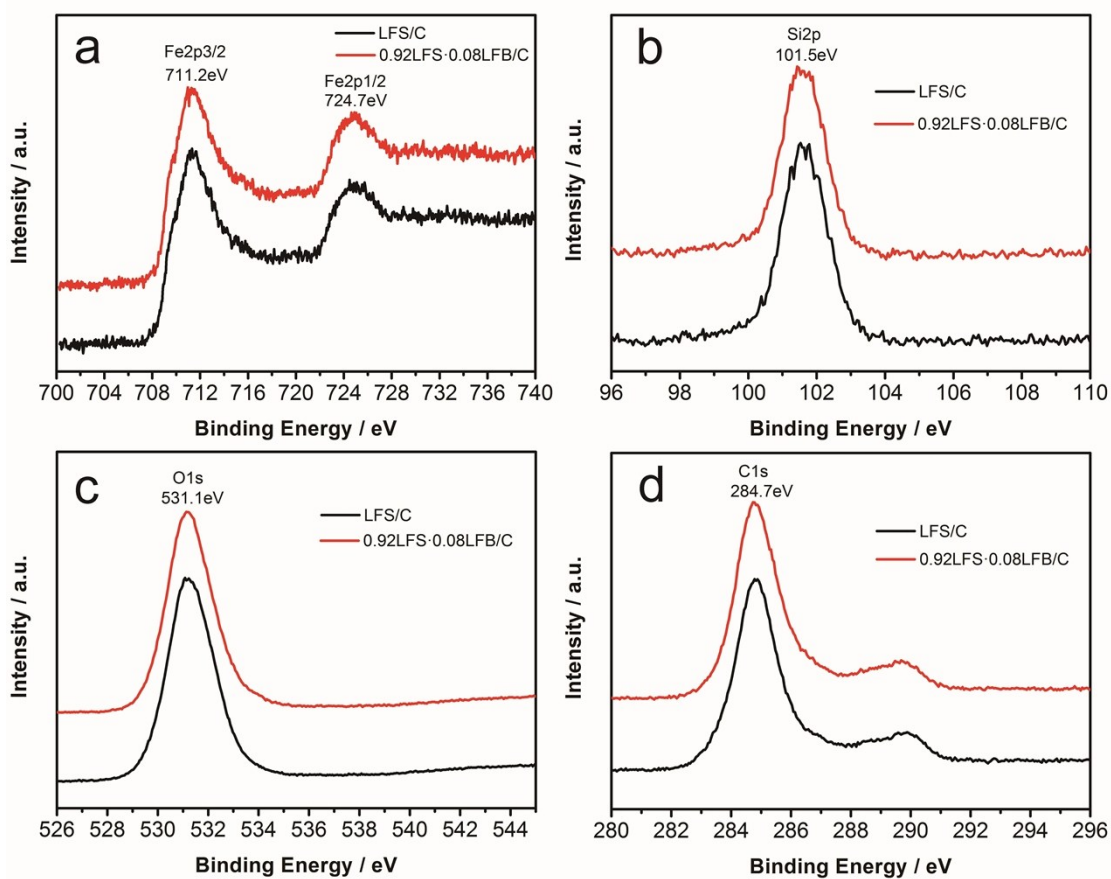

**Figure S6.** XPS of -Fe2p (a), -Si2p (b), -O1s (c) and -C1s (d) spectrum of the LFS/C and 0.92LFS·0.08LFB/C samples.

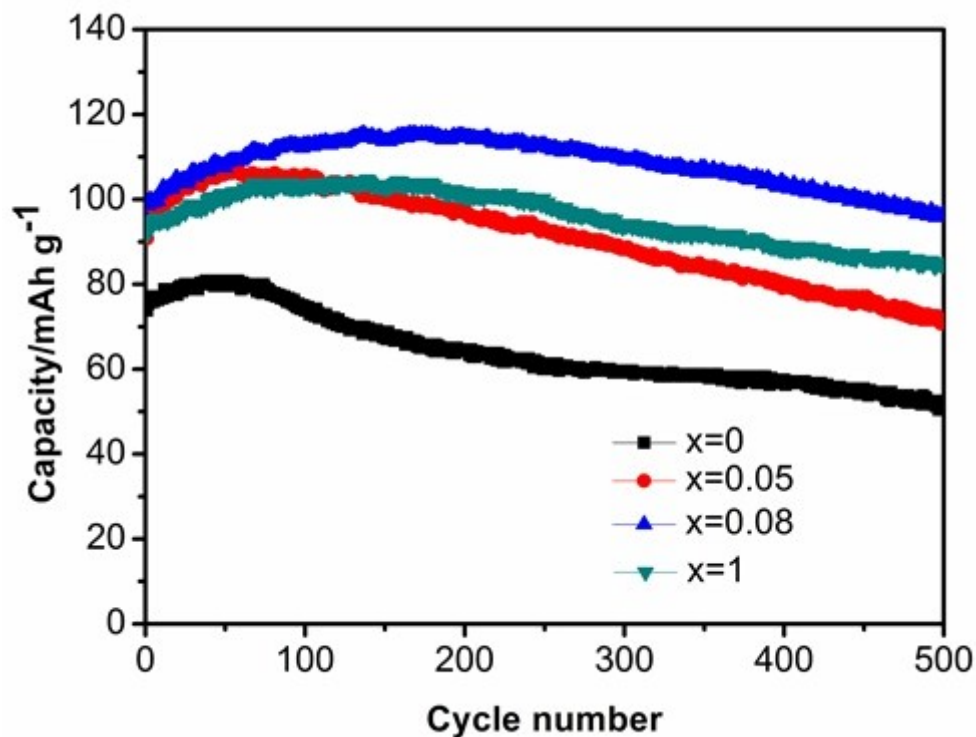

**Figure S7.** Cycle performance of (1-x)LFS·xLFB/C samples at 10 C.

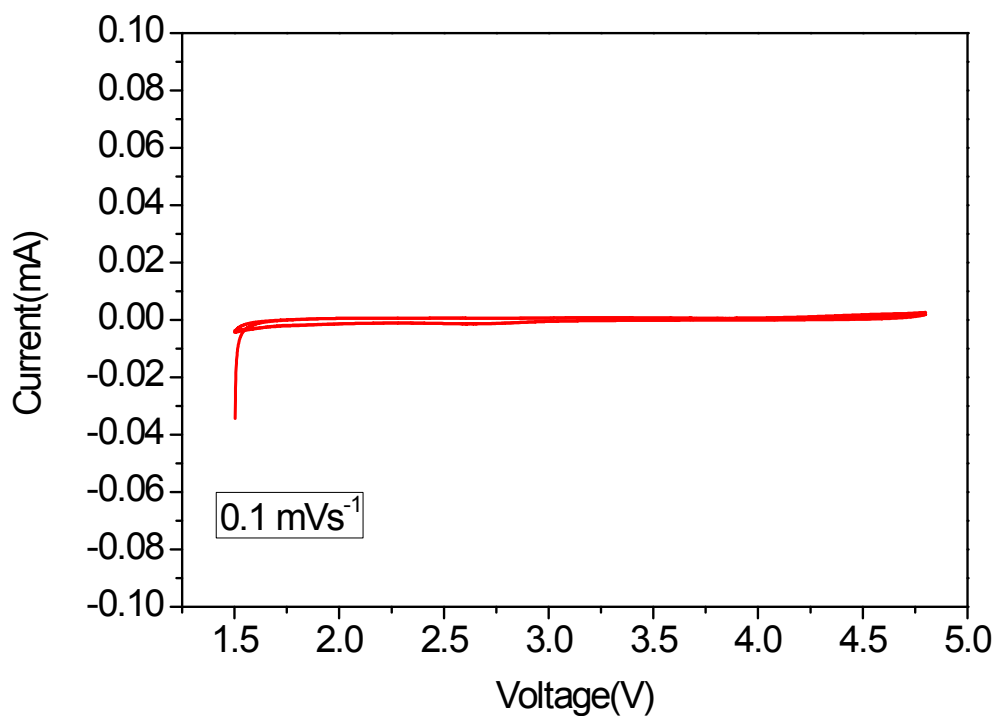

**Figure S8** CV curves for the battery without a cathode at a rate of  $0.1 \text{ mVs}^{-1}$ .

**Table S1** Data of the key elements content of the 0.92LFS·0.08LFB/C sample determined by the ICP analyses.

|     | Fe    | Li    | B     |
|-----|-------|-------|-------|
| wt% | 30.89 | 7.586 | 1.124 |
| at% | 0.553 | 1.093 | 0.104 |

### EIS analyses

**Figure 9a** in text displays the Nyquist plots of LFS/C, 0.92LFS·0.08LFB/C and LFB/C electrodes. The high-frequency intercept on the real axis indicates the ohmic resistance ( $R_{\Omega}$ ) of total resistances including electrolyte, separator and electrical

contacts. The arc in the high-frequency region is related to the migration resistance ( $R_{SEI}$ ) of lithium ions through the solid electrolyte interface (SEI), while the intermediate-frequency arc is attributed to the charge transfer resistance ( $R_{ct}$ ) in the cathode-electrolyte interface. Both arcs are associated with the interface between electrolyte and active particles [1].

The constant phase element (CPE) replaces the conventional double-layer and passivation film capacitance [2]. The impedance of CPE is defined as:

$$Z_{CPE} = 1/(Y_0 * (j\omega)^n) \quad (1)$$

where  $\omega$  is the angular frequency,  $j$  is imaginary unit, and  $Y_0$  and  $n$  are constants. A CPE represents a resistor when  $n = 0$ , a Warburg resistance when  $n = 0.5$ , and a capacitor when  $n = 1$ .

The diffusion coefficient of lithium ions ( $D_{Li}$ ) can be obtained according to the following equations [1, 3]:

$$D_{Li} = R^2 T^2 / 2 A^2 n^4 F^4 C_{Li}^2 \delta^2 \quad (2)$$

where  $R$  is the gas constant,  $T$  is the absolute temperature,  $A$  is the surface area of the cathode,  $n$  is the number of electrons per molecule during oxidation,  $F$  is the Faraday constant,  $C_{Li}$  is the concentration of lithium ion, and  $\delta$  is the Warburg coefficient which is related to  $Z'$  according to equation 3 [1, 3]:

$$Z' = (R_{\Omega} + R_{ct}) + \delta \omega^{-1/2} \quad (3)$$

where  $\omega$  is the angular frequency in the low frequency region, both  $R_{\Omega}$  and  $R_{ct}$  are kinetics parameters independent of frequency,  $\delta$  is the slope for the plot of  $Z'$  versus the reciprocal square root of the lower angular frequencies ( $\omega^{-1/2}$ ). The Warburg

coefficient ( $\delta$ ) is obtained by linear fitting of  $Z'$  versus  $\omega^{-1/2}$  as shown in **Figure 9b** in text.

**Table S2** The EIS parameters and diffusion coefficient of lithium ion for the LFS/C, 0.92LFS·0.08LFB/C and LFB/C samples tested at 45°C.

|                                      |              | LFS/C                  | 0.92LFS·0.08LFB/C      | LFB/C                  |
|--------------------------------------|--------------|------------------------|------------------------|------------------------|
| Resistance<br>( $\Omega$ )           | $R_{\Omega}$ | 4.7                    | 17.6                   | 5.1                    |
|                                      | $R_{SEI}$    | 118.5                  | 125.5                  | 88.0                   |
|                                      | $R_{ct}$     | 329.4                  | 235.6                  | 122.4                  |
| CPE <sub>1</sub> (S s <sup>n</sup> ) |              | $3.01 \times 10^{-5}$  | $1.95 \times 10^{-5}$  | $6.47 \times 10^{-5}$  |
| n <sub>1</sub>                       |              | 0.69                   | 0.70                   | 0.69                   |
| CPE <sub>1</sub> (S s <sup>n</sup> ) |              | $2.51 \times 10^{-4}$  | $1.32 \times 10^{-4}$  | $8.94 \times 10^{-5}$  |
| n <sub>2</sub>                       |              | 0.73                   | 0.59                   | 0.92                   |
| $Z_w$ (S s <sup>0.5</sup> )          |              | $7.42 \times 10^{-3}$  | $7.74 \times 10^{-3}$  | $1.15 \times 10^{-2}$  |
| D (cm <sup>2</sup> s <sup>-1</sup> ) |              | $2.36 \times 10^{-14}$ | $3.88 \times 10^{-14}$ | $1.14 \times 10^{-13}$ |

## References

- [1] R. Fu, Y. Li, H. Yang, Y. Zhang and X. Cheng, *Journal of The Electrochemical Society*, 2013, **160**, A3048-A3053.
- [2] M. Ciureanu and R. Roberge, *The Journal of Physical Chemistry B*, 2001, **105**, 3531-3539.
- [3] J. Yang, X. Kang, L. Hu, X. Gong and S. Mu, *Journal of Materials Chemistry A*, 2014, **2**, 6870-6878.
